# Supplementary material
Source: HighWire-hosted journal article supplement (http://rc.rcjournal.com/highwire/filestream/16323/field_highwire_adjunct_files/0/suppl.pdf)
Supplement: suppl.pdf [file suppl.pdf]

Supplemental Table 1: Predictors of mortality in patients with tuberculosis admitted to the intensive care unit

| PREDICTORS                                     | Remarks (references)                                                                                                                                                                                                                                                                                                                                                                                                                                                                                                                                                                                                                                                                                                                  |
|------------------------------------------------|---------------------------------------------------------------------------------------------------------------------------------------------------------------------------------------------------------------------------------------------------------------------------------------------------------------------------------------------------------------------------------------------------------------------------------------------------------------------------------------------------------------------------------------------------------------------------------------------------------------------------------------------------------------------------------------------------------------------------------------|
| <b>Demographic parameters and risk factors</b> |                                                                                                                                                                                                                                                                                                                                                                                                                                                                                                                                                                                                                                                                                                                                       |
| Age                                            | Advanced age predicted mortality in tuberculous pneumonia (OR 1.052, 95% CI, 1.010-1.095) <sup>1</sup>                                                                                                                                                                                                                                                                                                                                                                                                                                                                                                                                                                                                                                |
| Gender                                         | Male gender (OR 2.16, 95% CI, 1.02-4.61) <sup>2</sup><br>Female (OR 21.42, 95% CI, 1.70-270.59) <sup>3</sup>                                                                                                                                                                                                                                                                                                                                                                                                                                                                                                                                                                                                                          |
| Smoking                                        | Smoking (OR 4.54, 95% CI, 1.008-20.507) <sup>4</sup>                                                                                                                                                                                                                                                                                                                                                                                                                                                                                                                                                                                                                                                                                  |
| Chronic pancreatitis                           | Chronic pancreatitis (prevalence among non-survivors vs. survivors, 33.3% vs. 4.7%, p 0.001) <sup>5</sup>                                                                                                                                                                                                                                                                                                                                                                                                                                                                                                                                                                                                                             |
| HIV                                            | (a) Recent diagnosis of HIV (adjusted HR, 0.27, 95% CI, 0.10-0.72, p 0.009) <sup>6</sup><br>(b) Nadir CD4 counts less than 50 cells/cu.mm (Adjusted HR 4.58, 95% CI, 1.64-12.74, p 0.004) <sup>6</sup><br>(c) CD4 count < 200 per cu.mm <sup>7</sup>                                                                                                                                                                                                                                                                                                                                                                                                                                                                                  |
| <b>Laboratory parameters</b>                   |                                                                                                                                                                                                                                                                                                                                                                                                                                                                                                                                                                                                                                                                                                                                       |
| Serum albumin                                  | (a) Serum albumin < 2 g/dL (OR 3.73, 95% CI, 1.09-15.31) <sup>8</sup><br>(b) Low serum albumin <sup>2,9,10</sup> (three studies, of which OR provided in two of them [OR 0.39, 95% CI, 0.21-0.71 and 0.073, 95% CI, 0.016-0.335 respectively] <sup>2,9</sup> It was also able to predict the patients requiring MV (OR 0.39, 95% CI, 0.26-0.59) <sup>2</sup>                                                                                                                                                                                                                                                                                                                                                                          |
| Hyponatremia                                   | (a) Serum sodium mean (SD) value of 104.4(60) in non survivors vs. 135.1(4.5) in survivors, p < 0.05 <sup>11</sup><br>(b) Nine subjects (32%) had hyponatremia of which eight died* <sup>12</sup>                                                                                                                                                                                                                                                                                                                                                                                                                                                                                                                                     |
| C-reactive protein                             | Elevated CRP (OR 0.324, 95% CI, 0.146-0.716, p 0.005) <sup>9</sup>                                                                                                                                                                                                                                                                                                                                                                                                                                                                                                                                                                                                                                                                    |
| <b>Factors related to tuberculosis</b>         |                                                                                                                                                                                                                                                                                                                                                                                                                                                                                                                                                                                                                                                                                                                                       |
| Diagnosis                                      | (a) Longer time to diagnosis [11.8 (4.1) vs. 3.2 (2.7) days] more common in non-survivors <sup>13*</sup><br>(b) presence of smear positive for AFB (OR 5.667, 95% CI, 1.178-27.254) and positive PCR for M tuberculosis (OR 8.4, 95% CI, 1.6-44.104) <sup>4</sup>                                                                                                                                                                                                                                                                                                                                                                                                                                                                     |
| Type of tuberculosis                           | (a) Miliary tuberculosis (OR 9.04, 95% CI, 1.25-65.3) <sup>14</sup><br>(b) Isolated pulmonary tuberculosis (OR 5.667, 95% CI, 1.034-22.293, p 0.037) <sup>4</sup><br>(c) Presence of ARDS (non-survivors vs. survivors, 33.3% vs. 4.7%, p 0.008) <sup>5</sup>                                                                                                                                                                                                                                                                                                                                                                                                                                                                         |
| Radiology                                      | (a) Consolidation on chest radiograph <sup>7</sup> (HR 7.731, 95% CI, 1.036-57.680 <sup>15</sup> , OR 33.26, 95% CI, 2.88-386.39 <sup>3</sup> and OR 2.41, 95% CI, 1.17-4.98 <sup>2</sup> )<br>(b) Sequel of previous pulmonary tuberculosis (HR 6.61, 95% CI, 1.21-36.04, p 0.029) <sup>16</sup><br>(c) Wider extent of lesions (OR 1.307, 95% CI, 1.042-1.641, p 0.021) <sup>9</sup> and (OR 7.93, 95% CI, 2.44-25.77) <sup>3</sup><br>(d) Number of lobes involved (OR 1.83 per lobe, 95% CI, 1.12-2.98) <sup>8</sup>                                                                                                                                                                                                              |
| Treatment-related                              | (a) Treatment delay > 30 d (OR 3.73, 95% CI, 1.06-13.00) <sup>8</sup><br>(b) Not receiving treatment with ATT (adjusted HR 3.59, 95% CI, 1.00-12.88) <sup>17</sup>                                                                                                                                                                                                                                                                                                                                                                                                                                                                                                                                                                    |
| Use of corticosteroids                         | Lower risk of death in patients with tuberculous pneumonia (OR 0.544, 95% CI, 0.417-0.671) <sup>1</sup>                                                                                                                                                                                                                                                                                                                                                                                                                                                                                                                                                                                                                               |
| <b>ICU parameters</b>                          |                                                                                                                                                                                                                                                                                                                                                                                                                                                                                                                                                                                                                                                                                                                                       |
| Severity scores                                | <u>APACHE II:</u> (a) A higher baseline APACHE II scores (OR 1.08, 95% CI, 1.04-1.13, p 0.002) <sup>18</sup> and a higher score in non-survivors vs. survivors [21 (4.9) vs. 15.9 (5.3) p < 0.05) <sup>11</sup><br>(b) APACHE II score > 20 (HR 4.90, 95% CI, 1.43-16.80 p 0.012) <sup>16</sup><br><br><u>SOFA:</u> (a) SOFA score on the day of diagnosis of ARDS (OR 0.809, 95% CI, 0.691-0.946, p 0.008) <sup>19</sup><br>(b) increase in SOFA score, (OR 1.375 per unit rise in SOFA, 95% CI, 1.179-1.605) <sup>20</sup><br><br><u>SAPS II:</u> Higher score was independent predictor of mortality <sup>21</sup><br><br><u>CURB:</u> Lower scores had lesser risk of death (OR 0.916, 95% CI, 0.844-0.995, p 0.037) <sup>9</sup> |

|                             |                                                                                                                                                                                                                                                                                                                                                                                                                                                                                                                                                                                                                                                                                                                            |
|-----------------------------|----------------------------------------------------------------------------------------------------------------------------------------------------------------------------------------------------------------------------------------------------------------------------------------------------------------------------------------------------------------------------------------------------------------------------------------------------------------------------------------------------------------------------------------------------------------------------------------------------------------------------------------------------------------------------------------------------------------------------|
| MV                          | <p>(a) Diagnostic accuracy to predict mortality was highest for the need for MV (85%), it had a sensitivity, specificity, positive and negative predictive values 83.8%, 88.5%, 95.4% and 65.7% respectively.<sup>3</sup></p> <p>(b) Invasive MV was independent predictor of death in the following studies:<br/> Valade et al (OR 11.36, 95% CI, 1.55-83.48)<sup>14</sup><br/> Filiz et al (OR 7.58, 95% CI, 6.873-8.167)<sup>20</sup><br/> Duro et al (OR 4.25, 95% CI, 1.019-17.729)<sup>4</sup><br/> Erbes et al (MV in non-survivors vs. survivors, 73.3% vs. 25.6% p 0.002)<sup>5</sup></p> <p>(c) Development of requirement for MV during ICU stay (OR 20, 95% CI, 5.261-171.062)<sup>4</sup></p>                 |
| Physiological               | <p>(a) PaO<sub>2</sub>/FiO<sub>2</sub> ratio &lt; 108.5<sup>11</sup></p> <p>(b) Baseline driving pressure (OR 1.1, 95% CI, 1.03-1.17, p 0.003)<sup>18</sup></p>                                                                                                                                                                                                                                                                                                                                                                                                                                                                                                                                                            |
| <b>Complications in ICU</b> |                                                                                                                                                                                                                                                                                                                                                                                                                                                                                                                                                                                                                                                                                                                            |
| Organ failures              | <p>(a) Number of organ failures (OR 3.11 per failing organ, 95% CI, 1.45-6.65)<sup>8</sup></p> <p>(b) MOF (HR 2.651, 95% CI, 1.163-6.040)<sup>15</sup></p> <p>(c) MODS (OR 8.59, 95% CI, 1.85-101.27)<sup>22</sup> and (OR 6.0, 95% CI, 1.090-33.016)<sup>4</sup></p>                                                                                                                                                                                                                                                                                                                                                                                                                                                      |
| Sepsis and shock            | <p>(a) <u>Sepsis</u>:<br/> Erbes et al (Sepsis in non-survivors vs. survivors, 60% vs. 18.6%, p 0.001)<sup>5</sup><br/> Ryu et al (HR 5.84, 95% 1.63-20.95, p 0.007)<sup>16</sup></p> <p>(b) <u>Shock</u>:<br/> Shock unrelated to sepsis (OR 3.446, 95% CI, 1.286-15.102)<sup>1</sup></p> <p>(c) <u>Vasopressor requirement in ICU</u>: Independent predictor of mortality in the following studies<br/> Valade et al (OR 8.45, 95% CI, 1.29-55.18)<sup>14</sup><br/> Calligaro et al (adjusted HR 4.33, 95% CI, 1.49-12.60)<sup>17</sup><br/> Duro et al (OR 30, 95% CI, 5.261-171.062)<sup>4</sup><br/> ARF was independent predictor of mortality<sup>5</sup> (non-survivors vs. survivors, 46.7% vs. 0%, p 0.001)</p> |
| Acute renal failure         | <u>Nosocomial pneumonia</u> :                                                                                                                                                                                                                                                                                                                                                                                                                                                                                                                                                                                                                                                                                              |
| Nosocomial infections       | <p>Erbes et al (Nosocomial pneumonia in non-survivors vs. survivors, 86.7% vs. 48.8%, p 0.014)<sup>5</sup></p> <p>Presence of nosocomial pneumonia (OR 5.77, 95% CI, 1.33-44.36) and delay in its treatment &gt; 24 hours*<sup>22</sup></p> <p><u>Development of hospital acquired infection</u> (OR 6.0, 95% CI, 1.090-33.016)<sup>4</sup></p>                                                                                                                                                                                                                                                                                                                                                                            |

APACHE – acute physiology and chronic health evaluation; AFB – acid fast bacilli; ARDS – acute respiratory distress syndrome; ARF – acute renal failure; ATT – antitubercular therapy; CI – confidence interval; CRP – C-reactive protein; CURB – confusion, urea, respiratory rate, blood pressure; DM – diabetes mellitus; GI – gastrointestinal; HIV – human immunodeficiency virus; HR – hazards ratio; ICU – intensive care unit; MODS – multiorgan dysfunction syndrome; MOF – multiorgan failure; MV – mechanical ventilation; OR – odds ratio; PCR – polymerase chain reaction; SAPS - Simplified Acute Physiology Score; SOFA – sequential organ failure assessment; SD – standard deviation

\*Multivariate analysis not available

Supplemental table 2: Studies describing the role of glucocorticoids in critically ill tuberculosis subjects admitted to intensive care unit

| Author/year (number of patients)         | Steroid used (n) |       | Steroid not used (n) |       | Indications                                                                                                                    | Remarks/conclusion                                                                                                                                                                                                                                                             |
|------------------------------------------|------------------|-------|----------------------|-------|--------------------------------------------------------------------------------------------------------------------------------|--------------------------------------------------------------------------------------------------------------------------------------------------------------------------------------------------------------------------------------------------------------------------------|
|                                          | Dead             | Total | Dead                 | Total |                                                                                                                                |                                                                                                                                                                                                                                                                                |
| Levy et al. <sup>23</sup> 1987 (n=15)    | -                | 6     | -                    | 9     | -                                                                                                                              | No equivocal benefit or harm                                                                                                                                                                                                                                                   |
| Penner et al. <sup>24</sup> 1995 (n=13)  | 6                | 6     | 3                    | 7     | -                                                                                                                              | Of the 10 ARDS patients: 4/4 received steroid and all of them died vs. 3/6 in the no steroid group died                                                                                                                                                                        |
| Zahar et al. <sup>8</sup> 2001 (n=99)    | -                | 18    | -                    | 81    | Miliary tuberculosis and respiratory failure (n=18)                                                                            | -                                                                                                                                                                                                                                                                              |
| Kim et al. <sup>25</sup> 2003 (n=34)     | -                | 8     | -                    | 26    | ARDS (n=6)                                                                                                                     | 5 out of 6 ARDS died                                                                                                                                                                                                                                                           |
| Lee et al. <sup>15</sup> 2003 (n=41)     | 9                | 13    | 18                   | 28    | ARDS (n=13)                                                                                                                    | ≥2mg/kg methylprednisolone after 7 d of ARDS                                                                                                                                                                                                                                   |
| Erbes et al. <sup>5</sup> 2006 (n=58)    | -                | 40    | -                    | 18    | Severe inflammation related to tuberculosis (n=31)<br>ARDS (n=7)<br>COPD (n=2)                                                 | -                                                                                                                                                                                                                                                                              |
| Sharma et al. <sup>11</sup> 2006 (n=29)  | -                | 6     | -                    | 23    | Severe hypoxemia<br>ARDS while on ATT (n=4)<br>Seven days after ARDS (n=2)                                                     | -                                                                                                                                                                                                                                                                              |
| Kim et al. <sup>1</sup> 2008 (n=90)      | 24               | 44    | 35                   | 46    | ARDS (n=36)<br>Other reasons (n=8) [they were started on glucocorticoids before diagnosing tuberculosis (6 as COPD, 2 as COP)] | Mean (SD) dose 59 (6.7) mg/d prednisolone equivalent<br>Median (range) duration 20 (7-120) d<br>Glucocorticoids use did not affect duration of MV or oxygenation ratio measured at day 7<br>Favourable outcome with corticosteroid use in tubercular pneumonia group (p 0.046) |
| Lin et al. <sup>22</sup> 2009 (n=59)     | 9                | 14    | 31                   | 45    | Administered for severe pulmonary lesions (details NA)                                                                         | In patients with nosocomial pneumonia glucocorticoids use vs. no use was similar (6/29, 20.7% vs. 8/30, 26.7%, P = 0.761)                                                                                                                                                      |
| Lee et al. <sup>19</sup> 2011 (n=67)     | -                | 27    | -                    | 40    | ARDS (n=13)                                                                                                                    | ≥ 1mg/kg methylprednisolone<br>Mean (SD) duration 33.2 (45.1) days                                                                                                                                                                                                             |
| Deng et al. <sup>13</sup> 2012 (n=85)    | 8                | 35    | 38                   | 50    | Miliary tuberculosis and ARDS (n=35)                                                                                           | Methylprednisolone 80 g/d iv for 5 days along with ATT may have mortality benefit                                                                                                                                                                                              |
| Mahmoud et al. <sup>26</sup> 2016 (n=11) | 5                | NA    | 2                    | NA    | -                                                                                                                              | Seven patients died, of which five had received steroids                                                                                                                                                                                                                       |
| Yang et al. <sup>27</sup> 2016 (n=124)   | 34               | 70    | 27                   | 54    | ARDS (n=23)<br>Shock (n=13)<br>wheeze (n=9)<br>Other reasons (n=25)                                                            | Median dose 50 mg/d (IQR 40-75 mg) prednisolone.                                                                                                                                                                                                                               |
| Loh et al. <sup>10</sup> 2016 (n=75)     | 21               | 29    | 26                   | 46    | -                                                                                                                              | -                                                                                                                                                                                                                                                                              |
| Duro et al. <sup>4</sup> 2017 (n=39)     | 0                | 5     | 21                   | 34    | Meningeal or pericardial disease only (n=5)                                                                                    | -                                                                                                                                                                                                                                                                              |

ARDS – acute respiratory distress syndrome; ATT – antitubercular therapy; COP – cryptogenic organizing pneumonia; COPD – chronic obstructive pulmonary disease; ICU – intensive care unit; IQR – interquartile range; IPTW – inverse probability of treatment weighted; LOS – length of stay; MV – mechanical ventilation; OR – odds ratio; SD – standard deviation

Supplemental table 3: Quality of the studies included in the review using QualSyst tool<sup>28</sup>

| Criterion                                                         | Agarwal et al. (1977) <sup>29</sup> | Frame et al. (1987) <sup>30</sup> | Levy et al. (1987) <sup>23</sup> | Hayhurst et al. (1994) <sup>12</sup> | Penner et al. (1995) <sup>24</sup> | Vyskocil et al. (1995) <sup>31</sup> | Zahar et al. (2001) <sup>8</sup> | Hui et al. (2003) <sup>32</sup> | Kim et al. (2003) <sup>25</sup> | Lee et al. (2003) <sup>15</sup> | Erbes et al. (2006) <sup>5</sup> |
|-------------------------------------------------------------------|-------------------------------------|-----------------------------------|----------------------------------|--------------------------------------|------------------------------------|--------------------------------------|----------------------------------|---------------------------------|---------------------------------|---------------------------------|----------------------------------|
| 1 Question / objective sufficiently described?                    | 1                                   | 1                                 | 1                                | 1                                    | 2                                  | 1                                    | 2                                | 1                               | 1                               | 2                               | 1                                |
| 2 Study design evident and appropriate?                           | 1                                   | 1                                 | 1                                | 1                                    | 1                                  | 1                                    | 1                                | 1                               | 1                               | 1                               | 1                                |
| 3 Context for the study clear?                                    | 1                                   | 1                                 | 1                                | 1                                    | 2                                  | 1                                    | 1                                | 1                               | 1                               | 1                               | 1                                |
| 4 Connection to a theoretical framework /wider body of knowledge? | 1                                   | 1                                 | 1                                | 1                                    | 2                                  | 1                                    | 1                                | 1                               | 1                               | 1                               | 1                                |
| 5 Sampling strategy described, relevant and justified?            | 1                                   | 1                                 | 1                                | 1                                    | 1                                  | 1                                    | 2                                | 1                               | 1                               | 1                               | 1                                |
| 6 Data collection methods clearly described and systematic?       | 1                                   | 1                                 | 1                                | 1                                    | 1                                  | 1                                    | 2                                | 1                               | 1                               | 2                               | 1                                |
| 7 Data analysis clearly described and systematic?                 | 1                                   | 1                                 | 1                                | 0                                    | 1                                  | 1                                    | 2                                | 2                               | 1                               | 2                               | 1                                |
| 8 Use of verification procedure(s) to establish credibility?      | 1                                   | 1                                 | 1                                | 1                                    | 1                                  | 1                                    | 1                                | 1                               | 1                               | 1                               | 1                                |
| 9 Conclusions supported by the results?                           | 1                                   | 1                                 | 1                                | 1                                    | 1                                  | 1                                    | 2                                | 1                               | 1                               | 2                               | 2                                |
| 10 Reflexivity of the account?                                    | 1                                   | 1                                 | 1                                | 1                                    | 1                                  | 1                                    | 1                                | 1                               | 1                               | 1                               | 1                                |
| Total                                                             | 10                                  | 10                                | 10                               | 9                                    | 15                                 | 10                                   | 15                               | 11                              | 10                              | 14                              | 11                               |

|    | Criterion                                                       | Sharma<br>et al.<br>(2006) <sup>11</sup> | Ryu et<br>al.<br>(2007)<br><sub>16</sub> | Kim et<br>al.<br>(2008)<br><sub>1</sub> | Lin et al.<br>(2009) <sup>22</sup> | Ulasli<br>et al.<br>(2009)<br><sub>33</sub> | Silva et<br>al.<br>(2010)<br><sub>34</sub> | Alshimemeri<br>et al. (2011) <sup>35</sup> | Lee et al.<br>(2011) <sup>19</sup> | Deng et<br>al.<br>(2012)<br><sub>13</sub> | Valade<br>et al.<br>(2012)<br><sub>14</sub> | Balkema<br>et al.<br>(2014) <sup>7</sup> | Lanoix<br>et al.<br>(2014)<br><sub>21</sub> |
|----|-----------------------------------------------------------------|------------------------------------------|------------------------------------------|-----------------------------------------|------------------------------------|---------------------------------------------|--------------------------------------------|--------------------------------------------|------------------------------------|-------------------------------------------|---------------------------------------------|------------------------------------------|---------------------------------------------|
| 1  | Question / objective sufficiently described?                    | 2                                        | 2                                        | 2                                       | 1                                  | 1                                           | 1                                          | 1                                          | 1                                  | 2                                         | 1                                           | 2                                        | 1                                           |
| 2  | Study design evident and appropriate?                           | 1                                        | 1                                        | 1                                       | 1                                  | 1                                           | 1                                          | 1                                          | 1                                  | 1                                         | 1                                           | 2                                        | 1                                           |
| 3  | Context for the study clear?                                    | 1                                        | 1                                        | 1                                       | 1                                  | 1                                           | 1                                          | 1                                          | 1                                  | 1                                         | 1                                           | 1                                        | 1                                           |
| 4  | Connection to a theoretical framework /wider body of knowledge? | 1                                        | 1                                        | 1                                       | 1                                  | 1                                           | 1                                          | 1                                          | 1                                  | 1                                         | 1                                           | 1                                        | 1                                           |
| 5  | Sampling strategy described, relevant and justified?            | 1                                        | 1                                        | 1                                       | 1                                  | 1                                           | 2                                          | 1                                          | 1                                  | 1                                         | 1                                           | 2                                        | 1                                           |
| 6  | Data collection methods clearly described and systematic?       | 2                                        | 1                                        | 1                                       | 1                                  | 1                                           | 2                                          | 0                                          | 1                                  | 2                                         | 1                                           | 2                                        | 1                                           |
| 7  | Data analysis clearly described and systematic?                 | 2                                        | 2                                        | 2                                       | 1                                  | 1                                           | 2                                          | 1                                          | 2                                  | 2                                         | 2                                           | 2                                        | 2                                           |
| 8  | Use of verification procedure(s) to establish credibility?      | 1                                        | 1                                        | 1                                       | 1                                  | 1                                           | 1                                          | 1                                          | 1                                  | 1                                         | 1                                           | 1                                        | 1                                           |
| 9  | Conclusions supported by the results?                           | 1                                        | 1                                        | 1                                       | 2                                  | 1                                           | 2                                          | 1                                          | 2                                  | 1                                         | 1                                           | 2                                        | 2                                           |
| 10 | Reflexivity of the account?                                     | 1                                        | 1                                        | 1                                       | 1                                  | 1                                           | 1                                          | 1                                          | 1                                  | 1                                         | 1                                           | 1                                        | 1                                           |
|    | Total                                                           | 13                                       | 12                                       | 12                                      | 11                                 | 10                                          | 14                                         | 9                                          | 12                                 | 13                                        | 11                                          | 16                                       | 12                                          |

|    | Criterion                                                       | Mansour et al. (2014) <sup>3</sup> | Calligaro et al. (2015) <sup>17</sup> | Rollas et al. (2015) <sup>36</sup> | Bhurayanontachai et al. (2016) <sup>2</sup> | Filiz et al. (2016) <sup>20</sup> | Kim et al. (2016) <sup>9</sup> | Loh et al. (2016) <sup>10</sup> | Mahmoud et al. (2016) <sup>26</sup> | Pecego et al. (2016) <sup>6</sup> | Yang et al. (2016) <sup>27</sup> | Duro et al. (2017) <sup>4</sup> | Muthu et al. (2017) <sup>18</sup> |
|----|-----------------------------------------------------------------|------------------------------------|---------------------------------------|------------------------------------|---------------------------------------------|-----------------------------------|--------------------------------|---------------------------------|-------------------------------------|-----------------------------------|----------------------------------|---------------------------------|-----------------------------------|
| 1  | Question / objective sufficiently described?                    | 1                                  | 2                                     | 1                                  | 1                                           | 1                                 | 1                              | 1                               | 1                                   | 1                                 | 2                                | 1                               | 2                                 |
| 2  | Study design evident and appropriate?                           | 2                                  | 2                                     | 1                                  | 1                                           | 1                                 | 1                              | 1                               | 1                                   | 1                                 | 1                                | 1                               | 1                                 |
| 3  | Context for the study clear?                                    | 1                                  | 1                                     | 1                                  | 1                                           | 1                                 | 1                              | 1                               | 1                                   | 2                                 | 1                                | 1                               | 2                                 |
| 4  | Connection to a theoretical framework /wider body of knowledge? | 1                                  | 2                                     | 1                                  | 1                                           | 1                                 | 1                              | 1                               | 1                                   | 1                                 | 1                                | 1                               | 1                                 |
| 5  | Sampling strategy described, relevant and justified?            | 2                                  | 2                                     | 1                                  | 2                                           | 1                                 | 1                              | 1                               | 1                                   | 1                                 | 1                                | 1                               | 1                                 |
| 6  | Data collection methods clearly described and systematic?       | 1                                  | 2                                     | 1                                  | 2                                           | 1                                 | 1                              | 1                               | 1                                   | 1                                 | 2                                | 2                               | 1                                 |
| 7  | Data analysis clearly described and systematic?                 | 2                                  | 8                                     | 1                                  | 2                                           | 2                                 | 1                              | 1                               | 1                                   | 1                                 | 2                                | 1                               | 1                                 |
| 8  | Use of verification procedure(s) to establish credibility?      | 1                                  | 1                                     | 1                                  | 1                                           | 1                                 | 1                              | 1                               | 1                                   | 1                                 | 1                                | 1                               | 1                                 |
| 9  | Conclusions supported by the results?                           | 2                                  | 2                                     | 1                                  | 1                                           | 2                                 | 1                              | 1                               | 1                                   | 1                                 | 1                                | 1                               | 1                                 |
| 10 | Reflexivity of the account?                                     | 1                                  | 2                                     | 1                                  | 1                                           | 1                                 | 1                              | 1                               | 1                                   | 1                                 | 1                                | 1                               | 1                                 |
|    | Total                                                           | 14                                 | 18                                    | 10                                 | 13                                          | 12                                | 10                             | 10                              | 10                                  | 11                                | 13                               | 11                              | 12                                |
